# Supplementary material for: Stochastic analysis of capillary condensation in disordered mesopores
Source: Royal Society of Chemistry journal article supplement (doi:10.1039/c8cp01628c), 2018-01-01
Supplement: c8cp01628c1.pdf [file c8cp01628c1.pdf]

## Supporting Information to

### Stochastic Analysis of Capillary Condensation in Disordered Mesopores

#### Derivation of Eq. (23)

Cedric J. Gommès and Anthony P. Roberts

The specific surface area of the condensate free surface is related to the small-distance behavior of the covariance of the empty pore space  $C_{OO}(r)$  via

$$C_{OO}(r) \simeq \phi_O - \frac{a_O}{4}r + O(r^2) \quad (\text{SI-1})$$

From Eq. (20) of the main text, the covariance can be calculated as

$$C_{OO}(r) = \langle H[\beta - Y(\mathbf{x}_1)]H[\gamma - Z(\mathbf{x}_1)]H[\beta - Y(\mathbf{x}_2)]H[\gamma - Z(\mathbf{x}_2)] \rangle \quad (\text{SI-2})$$

where the two points  $\mathbf{x}_1$  and  $\mathbf{x}_2$  are at distance  $r$  from one another. This can be expressed in terms of the multivariate error function  $\Lambda_4$ , which can in principle be simplified using the same methods as used for  $\Lambda_2$  and  $\Lambda_3$  in Appendix A of the main text. However, the function  $\Lambda_4$  depends in general on a total of ten arguments (four thresholds  $\alpha$  and six correlations  $g_{ij}$ ) so that the mathematics would be extremely cumbersome. We therefore consider here only the small- $r$  behavior of  $C_{OO}$ .

In Dirichlet's representation, the step function  $H[\cdot]$  is written as follows

$$H[y - \alpha] = \frac{-1}{2\pi i} \int_C \frac{dw}{w} e^{-i(y-\alpha)w} \quad (\text{SI-3})$$

where the contour  $C$  lies along the real axis but crosses the imaginary axis in upper half plane. Using Eq. (SI-3), the covariance function in Eq. (SI-2) can be written as

$$C_{OO}(r) = \left(\frac{-1}{2i\pi}\right)^4 \int_C \frac{dw_1}{w_1} \int_C \frac{dw_2}{w_2} \int_C \frac{dw'_1}{w'_1} \int_C \frac{dw'_2}{w'_2} e^{-i(w_1\beta + w_2\gamma + w'_1\beta + w'_2\gamma)} \langle e^{i\mathbf{w}^T \cdot \mathbf{Y}} \rangle \quad (\text{SI-4})$$

where we have used the notations  $\mathbf{w}^T = [w_1 \ w'_1 \ w_2 \ w'_2]$  and  $\mathbf{Y}^T = [Y(\mathbf{x}_1) \ Z(\mathbf{x}_1) \ Y(\mathbf{x}_2) \ Z(\mathbf{x}_2)]$ . The average value is calculated as

$$\langle e^{i\mathbf{w}^T \cdot \mathbf{Y}} \rangle = e^{-\frac{1}{2}\mathbf{w}^T \mathbf{G} \mathbf{w}} \quad (\text{SI-5})$$

where  $\mathbf{G}$  is the covariance matrix of  $\mathbf{Y}$  having the following structure

$$\mathbf{G} = \begin{pmatrix} \hat{\mathbf{G}}(0) & \hat{\mathbf{G}}(r) \\ \hat{\mathbf{G}}(r) & \hat{\mathbf{G}}(0) \end{pmatrix} \quad \text{with} \quad \hat{\mathbf{G}}(r) = \begin{pmatrix} g_Y(r) & g_{YZ}(r) \\ g_{YZ}(r) & g_Z(r) \end{pmatrix} \quad (\text{SI-6})$$

The only term proportional to  $g_{YZ}(0)$  in the quadratic form  $\mathbf{w}^T \mathbf{G} \mathbf{w}$  being  $2g_{YZ}(0)(w_1 w'_1 + w_2 w'_2)$ , one can remove the singularity at  $w_1 = w'_1 = 0$  (or at  $w_2 = w'_2 = 0$ ) in Eq. (SI-4) by taking the derivative of  $C_{OO}(r)$  with respect to  $g_{YZ}(0)$ . After some algebra this leads to

$$\frac{\partial C_{OO}(r)}{\partial g_{YZ}(0)} = -2 \left(\frac{-1}{2i\pi}\right)^4 \int_C \frac{dw_2}{w_2} \int_C \frac{dw'_2}{w'_2} e^{-i\mathbf{w}_2^T \cdot \alpha - \frac{1}{2}\mathbf{w}_2^T \hat{\mathbf{G}}(0) \mathbf{w}_2} \int_{-\infty}^{\infty} dw_1 \int_{-\infty}^{\infty} dw'_1 e^{-i\mathbf{w}_1^T \cdot \chi - \frac{1}{2}\mathbf{w}_1^T \hat{\mathbf{G}}(0) \mathbf{w}_1} \quad (\text{SI-7})$$

with

$$\alpha^T = [\beta \ \gamma], \quad \mathbf{w}_1^T = [w_1 \ w'_1], \quad \mathbf{w}_2^T = [w_2 \ w'_2] \quad (\text{SI-8})$$

and

$$\chi = \alpha - i\hat{\mathbf{G}}(r)\mathbf{w}_2 \quad (\text{SI-9})$$

The extra factor 2 in Eq. (SI-7) results from the symmetry of  $\mathbf{w}^T \mathbf{G} \mathbf{w}$  with respect to  $\mathbf{w}_1$  and  $\mathbf{w}_2$ .

Removing the singularity in the contour integrals turns them into regular integrals along the real axis, which can be calculated using the general result

$$\int_{-\infty}^{+\infty} dw_1 \dots \int_{-\infty}^{+\infty} dw_n \quad e^{-\frac{1}{2}\mathbf{w}^T \mathbf{H} \mathbf{w} - i\mathbf{w}^T \cdot \mathbf{z}} = \frac{(2\pi)^{n/2}}{|\mathbf{H}|^{1/2}} e^{-\frac{1}{2}\mathbf{z}^T \mathbf{H}^{-1} \mathbf{z}} \quad (\text{SI-10})$$

which holds for any symmetric and positive-definite matrix  $\mathbf{H}$ . Applying this formula to simplify Eq. (SI-7) leads to

$$\frac{\partial C_{OO}(r)}{\partial g_{YZ}(0)} = \frac{-1}{4\pi^3} \frac{1}{|\hat{\mathbf{G}}(0)|^{1/2}} e^{-\frac{1}{2}\alpha^T \hat{\mathbf{G}}^{-1}(0)\alpha} \int_C \frac{dw_2}{w_2} \int_C \frac{dw'_2}{w'_2} e^{-i\mathbf{w}_2^T \cdot \mu - \frac{1}{2}\mathbf{w}_2^T \mathbf{H} \mathbf{w}_2} \quad (\text{SI-11})$$

with

$$\mu = \alpha - \hat{\mathbf{G}}(r)\hat{\mathbf{G}}^{-1}(0)\alpha \quad \text{and} \quad \mathbf{H} = \hat{\mathbf{G}}(0) - \hat{\mathbf{G}}(r)\hat{\mathbf{G}}^{-1}(0)\hat{\mathbf{G}}(r) \quad (\text{SI-12})$$

The double contour integral in Eq. (SI-11) can be conveniently expressed in terms of  $\Lambda_2$ . This eventually leads to the following final expression

$$\begin{aligned} \frac{\partial C_{OO}(r)}{\partial g_{YZ}(0)} &= \frac{1}{\pi\sqrt{1-g_{YZ}^2(0)}} \exp\left(-\frac{\beta^2 + \gamma^2 - 2\beta\gamma g_{YZ}(0)}{2(1-g_{YZ}^2(0))}\right) \\ &\times \Lambda_2 \left[ \begin{pmatrix} -\mu_1/\sqrt{h_1} \\ -\mu_2/\sqrt{h_2} \end{pmatrix}, \begin{pmatrix} 1 & h_{12}/\sqrt{h_1 h_2} \\ h_{12}/\sqrt{h_1 h_2} & 1 \end{pmatrix} \right] \end{aligned} \quad (\text{SI-13})$$

where  $\mu_{1/2}$  and  $h_{1/2/12}$  are the components of  $\mu$  and  $\mathbf{H}$ . The latter are obtained through Eq. (SI-12) via successive matrix multiplications; the values are

$$\mu_1 = \beta - \frac{1}{1-g_{YZ}^2(0)} \left[ \beta [g_Y(r) - g_{YZ}(0)g_{YZ}(r)] + \gamma [g_{YZ}(r) - g_Y(r)g_{YZ}(0)] \right] \quad (\text{SI-14})$$

$$\mu_2 = \gamma - \frac{1}{1-g_{YZ}^2(0)} \left[ \beta [g_{YZ}(r) - g_Z(r)g_{YZ}(0)] + \gamma [g_Z(r) - g_{YZ}(0)g_{YZ}(r)] \right] \quad (\text{SI-15})$$

and

$$h_1 = 1 - \frac{1}{1-g_{YZ}^2(0)} \left[ g_Y^2(r) + g_{YZ}^2(r) - 2g_Y(r)g_{YZ}(0)g_{YZ}(r) \right] \quad (\text{SI-16})$$

$$h_2 = 1 - \frac{1}{1-g_{YZ}^2(0)} \left[ g_Z^2(r) + g_{YZ}^2(r) - 2g_Z(r)g_{YZ}(0)g_{YZ}(r) \right] \quad (\text{SI-17})$$

$$h_{12} = g_{YZ}(0) - \frac{1}{1-g_{YZ}^2(0)} \left[ g_{YZ}(r) [g_Y(r) + g_Z(r)] - g_{YZ}(0) [g_Y(r)g_Z(r) + g_{YZ}^2(r)] \right] \quad (\text{SI-18})$$

The partial derivative  $\partial C_{OO}/\partial g_{YZ}(r)$  can be calculated along the same lines as Eq. (SI-13). This leads to the following expression

$$\begin{aligned} \frac{\partial C_{OO}(r)}{\partial g_{YZ}(r)} &= \frac{1}{\pi\sqrt{1-g_{YZ}^2(r)}} \exp\left(-\frac{\beta^2 + \gamma^2 - 2\beta\gamma g_{YZ}(r)}{2(1-g_{YZ}^2(r))}\right) \\ &\times \Lambda_2 \left[ \begin{pmatrix} -\mu'_1/\sqrt{h'_1} \\ -\mu'_2/\sqrt{h'_2} \end{pmatrix}, \begin{pmatrix} 1 & h'_{12}/\sqrt{h'_1 h'_2} \\ h'_{12}/\sqrt{h'_1 h'_2} & 1 \end{pmatrix} \right] \end{aligned} \quad (\text{SI-19})$$

where  $\mu'_{1/2}$  and  $h'_{1/2/12}$  are obtained from Eqs. (SI-14), (SI-15), (SI-16), (SI-17) and (SI-18) by replacing  $g_{YZ}(0)$  with  $g_{YZ}(r)$  and *vice versa*.

The function  $C_{OO}(r)$  can be viewed as being defined in a 4-dimensional parameter space, with dimensions  $g_Y(r)$ ,  $g_Z(r)$ ,  $g_{YZ}(0)$  and  $g_{YZ}(r)$ . Knowing the two partial derivatives  $\partial C_{OO}(r)/\partial g_{YZ}(0)$  and  $\partial C_{OO}(r)/\partial g_{YZ}(r)$  enables one to calculate the value of  $C_{OO}(r)$  via a path integral in the corresponding  $[g_{YZ}(0), g_{YZ}(r)]$  plane. In order to formalize this, we note that Eqs. (SI-13) and (SI-19) have the structure

$$\frac{\partial C_{OO}}{\partial x} = f(x, y) \quad \text{and} \quad \frac{\partial C_{OO}}{\partial y} = f(y, x) \quad (\text{SI-20})$$

where  $x$  stands for  $g_{YZ}(0)$  and  $y$  for  $g_{YZ}(r)$ . A natural choice for the path along which to integrate is the straight line joining the points  $[x = 0; y = 0]$  and  $[x = g_{YZ}(0); y = g_{YZ}(r)]$ , which can be parametrized as

$$x = tg_{YZ}(0) \quad y = tg_{YZ}(r) \quad (\text{SI-21})$$

where  $t$  is an integration variable that takes values between 0 and 1. Evaluating the path integral along this straight line leads to

$$C_{OO}(r) = C_{OO}(r)\Big|_0 + g_{YZ}(0) \int_0^1 f(tg_{YZ}(0), tg_{YZ}(r)) dt + g_{YZ}(r) \int_0^1 f(tg_{YZ}(r), tg_{YZ}(0)) dt \quad (\text{SI-22})$$

The starting point of the path,  $C_{OO}(r)\Big|_0$ , corresponds to the situation where  $g_{YZ}(r) = 0$  for all  $r$ , which means that the fields  $Y$  and  $Z$  are independent. In this case the two-point function takes the value

$$C_{OO}(r)\Big|_0 = \left\{ 1 - 2\Lambda_1[\beta] + \Lambda_2 \left[ \begin{pmatrix} \beta \\ \beta \end{pmatrix}, \begin{pmatrix} 1 & g_Y(r) \\ g_Y(r) & 1 \end{pmatrix} \right] \right\} \\ \times \left\{ 1 - 2\Lambda_1[\gamma] + \Lambda_2 \left[ \begin{pmatrix} \gamma \\ \gamma \end{pmatrix}, \begin{pmatrix} 1 & g_Z(r) \\ g_Z(r) & 1 \end{pmatrix} \right] \right\} \quad (\text{SI-23})$$

which results directly from Eq. (SI-2) if the fields  $Y$  and  $Z$  are independent from one another.

The specific surface area  $a_O$  then obtained from Eq. (SI-1). For small values of  $r$  the field correlation functions are quadratic, and their expressions are given by Eq. (4), (B8) and (B10) of the main text. Using these expressions in Eqs. (SI-14), (SI-15), (SI-16), (SI-17) and (SI-18), and neglecting all contributions of order  $O(r^3)$ , one obtains

$$\frac{\mu_1}{\sqrt{h_1}} = \frac{\nu_1 r}{\sqrt{2}l_Y} \quad \frac{\mu_2}{\sqrt{h_2}} = \frac{\nu_2 r}{\sqrt{2}l_Z} \quad \frac{h_{12}}{\sqrt{h_1 h_2}} = g_{YZ}(0) \frac{l_Y l_Z}{l_Y Z} \quad (\text{SI-24})$$

with

$$\nu_1 = \beta + \frac{(\beta g_{YZ}(0) - \gamma) g_{YZ}(0)}{1 - g_{YZ}^2(0)} \left[ 1 - \left( \frac{l_Y}{l_{YZ}} \right)^2 \right] \quad (\text{SI-25})$$

and

$$\nu_2 = \gamma + \frac{(\gamma g_{YZ}(0) - \beta) g_{YZ}(0)}{1 - g_{YZ}^2(0)} \left[ 1 - \left( \frac{l_Z}{l_{YZ}} \right)^2 \right] \quad (\text{SI-26})$$

Introducing these expressions in Eq. (SI-13) leads to

$$\frac{\partial C_{OO}}{\partial g_{YZ}(0)} = \frac{1}{\pi \sqrt{1 - g_{12}^2(0)}} \exp \left( - \frac{\beta^2 + \gamma^2 - 2\beta\gamma g_{YZ}(0)}{2(1 - g_{YZ}^2(0))} \right) \\ \times \left\{ \frac{1}{4} + \frac{1}{4\sqrt{\pi}} \left( \frac{\nu_1}{l_Y} + \frac{\nu_2}{l_Z} \right) + \frac{1}{2\pi} \arcsin \left( g_{YZ}(0) \frac{l_Y l_Z}{l_{YZ}} \right) \right\} + O(r^2) \quad (\text{SI-27})$$

If we proceed in the same way for Eq. (SI-19), i.e. starting with Eqs. (SI-14), (SI-15), (SI-16), (SI-17) and (SI-18) with  $g_{YZ}(0)$  exchanged with  $g_{YZ}(r)$ , this eventually leads to

$$\frac{\mu'_1}{\sqrt{h'_1}} = \frac{\nu'_1 r}{\sqrt{2}l_Y} \quad \frac{\mu'_2}{\sqrt{h'_2}} = \frac{\nu'_2 r}{\sqrt{2}l_Z} \quad \frac{h'_{12}}{\sqrt{h'_1 h'_2}} = -g_{12}(0) \frac{l_Y l_Z}{l_{YZ}} \quad (\text{SI-28})$$

with

$$\nu'_1 = \beta + \frac{(\beta g_{YZ}(0) - \gamma)g_{YZ}(0)}{1 - g_{YZ}^2(0)} \left[ 1 + \left( \frac{l_Y}{l_{YZ}} \right)^2 \right] \quad (\text{SI-29})$$

and

$$\nu'_2 = \gamma + \frac{(\gamma g_{YZ}(0) - \beta)g_{YZ}(0)}{1 - g_{YZ}^2(0)} \left[ 1 + \left( \frac{l_Z}{l_{YZ}} \right)^2 \right] \quad (\text{SI-30})$$

We finally obtain

$$\begin{aligned} \frac{\partial C_{OO}}{\partial g_{YZ}(r)} &= \frac{1}{\pi \sqrt{1 - g_{YZ}^2(0)}} \exp \left( -\frac{\beta^2 + \gamma^2 - 2\beta\gamma g_{YZ}(0)}{2(1 - g_{YZ}^2(0))} \right) \\ &\times \left\{ \frac{1}{4} + \frac{1}{4\sqrt{\pi}} \left( \frac{\nu'_1}{l_Y} + \frac{\nu'_2}{l_Y} \right) - \frac{1}{2\pi} \arcsin \left( g_{YZ}(0) \frac{l_Y l_Z}{l_{YZ}} \right) \right\} + O(r^2) \end{aligned} \quad (\text{SI-31})$$

If one introduces Eqs. (SI-27) and (SI-31) into Eq. (SI-22), one eventually finds Eq. (SI-1) with  $\phi_O$  and  $a_O$  given by Eqs. (21) and (23) of the main text, respectively.
